# Supplementary material for: Expeditious recruitment of circulating memory CD8 T cells to the liver facilitates control of malaria
Source: PubMed Central journal article supplement — Cell Rep. Author manuscript; Available in PMC 2021 Nov 29. (PMC8628427; doi:10.1016/j.celrep.2021.109956), 2021-11-02
Supplement: NIHMS1753648-supplement-1.pdf [file NIHMS1753648-supplement-1.pdf]

**Supplemental information**

**Expeditious recruitment of circulating  
memory CD8 T cells to the liver  
facilitates control of malaria**

**Mitchell N. Lefebvre, Fionna A. Surette, Scott M. Anthony, Rahul Vijay, Isaac J. Jensen, Lecia L. Pewe, Lisa S. Hancox, Natalija Van Braeckel-Budimir, Stephanie van de Wall, Stina L. Urban, Madison R. Mix, Samarchith P. Kurup, Vladimir P. Badovinac, Noah S. Butler, and John T. Harty**

**Figure S1. Related to Figure 1.**

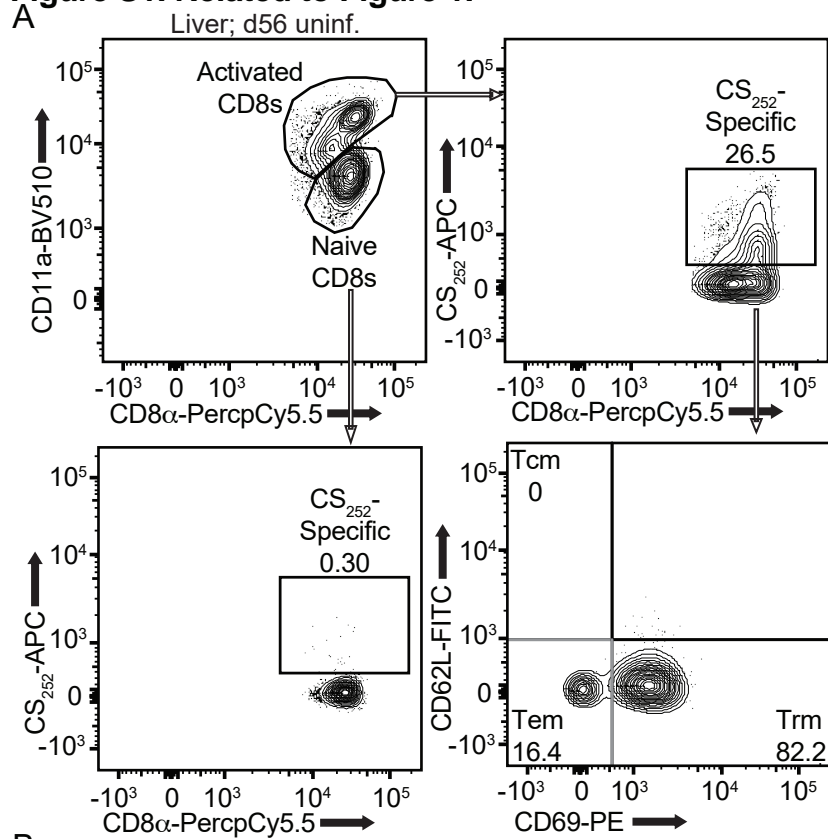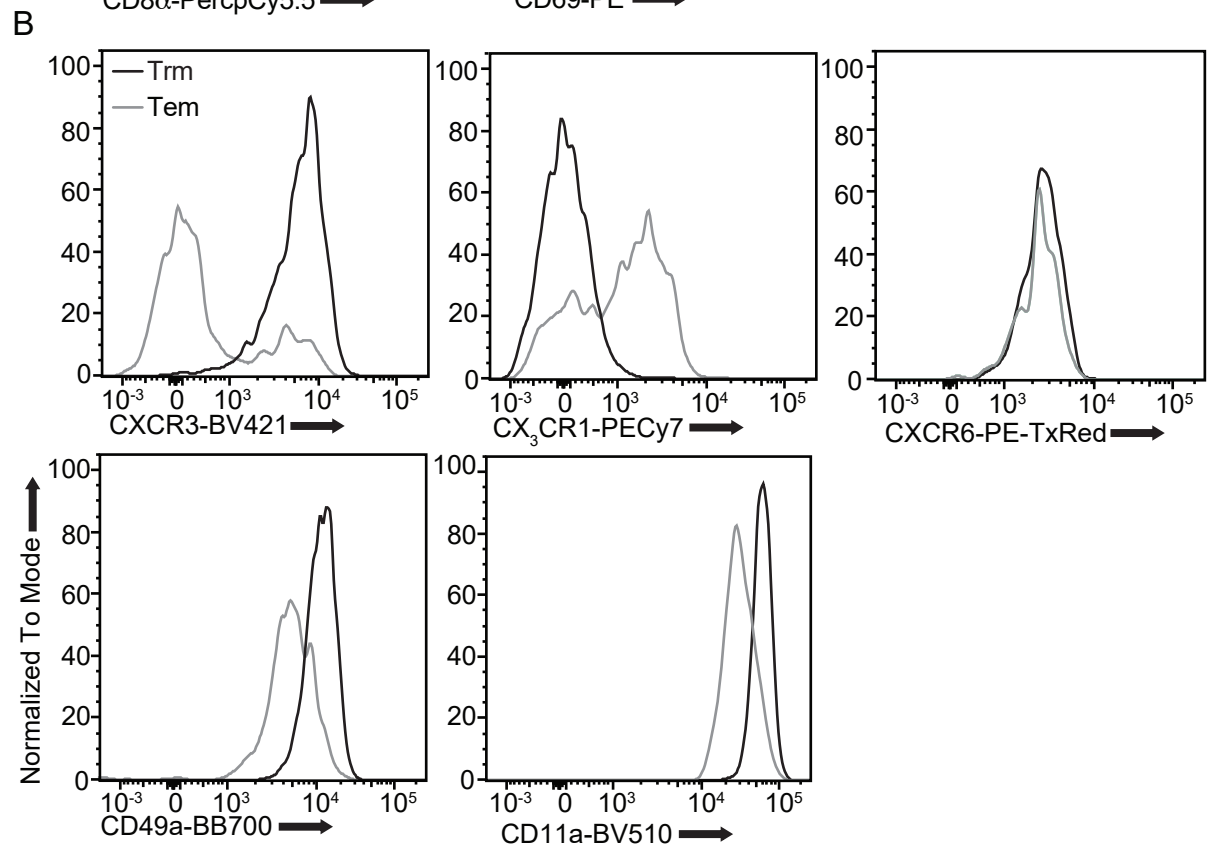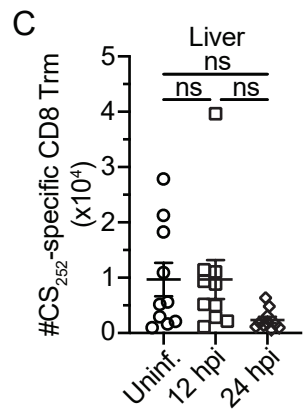

**SUP FIG 1. RAS vaccination induces liver Trm and circulating Tem (Related to FIG 1).**

A) Representative flow cytometry from the liver of a RAS immunized mouse 1 month post-boost. Delineation of CD8 $\alpha$ + cells into activated (CD11a<sup>hi</sup> CD8 $\alpha$ <sup>hi/lo</sup>) and naïve (CD11a<sup>int</sup>CD8 $\alpha$ <sup>hi</sup>) populations (top row, left panel). CS<sub>252</sub>-specific tetramer staining on activated (top row, right panel) and naïve cells (bottom row, left panel). CD62L and CD69 staining of tetramer+ cells (bottom row, right panel).

B) Representative histograms of staining of the indicated T cell phenotypic markers from the livers of RAS-vaccinated mice 56 days after the first RAS vaccination.

C) Numbers of CS<sub>252</sub>-specific Trm cells recovered from livers of RAS-vaccinated mice at 0, 12, & 24 hpi with *Pb* sporozoites.

All data are combined from two independent experiments, each with at least three mice per group. Each dot represents an individual mouse and mean  $\pm$  SEM are depicted. (C) One way ANOVA comparing the mean of each column to the mean of every other column was performed. ns p > 0.05.

**Figure S2. Related to Figure 2.**

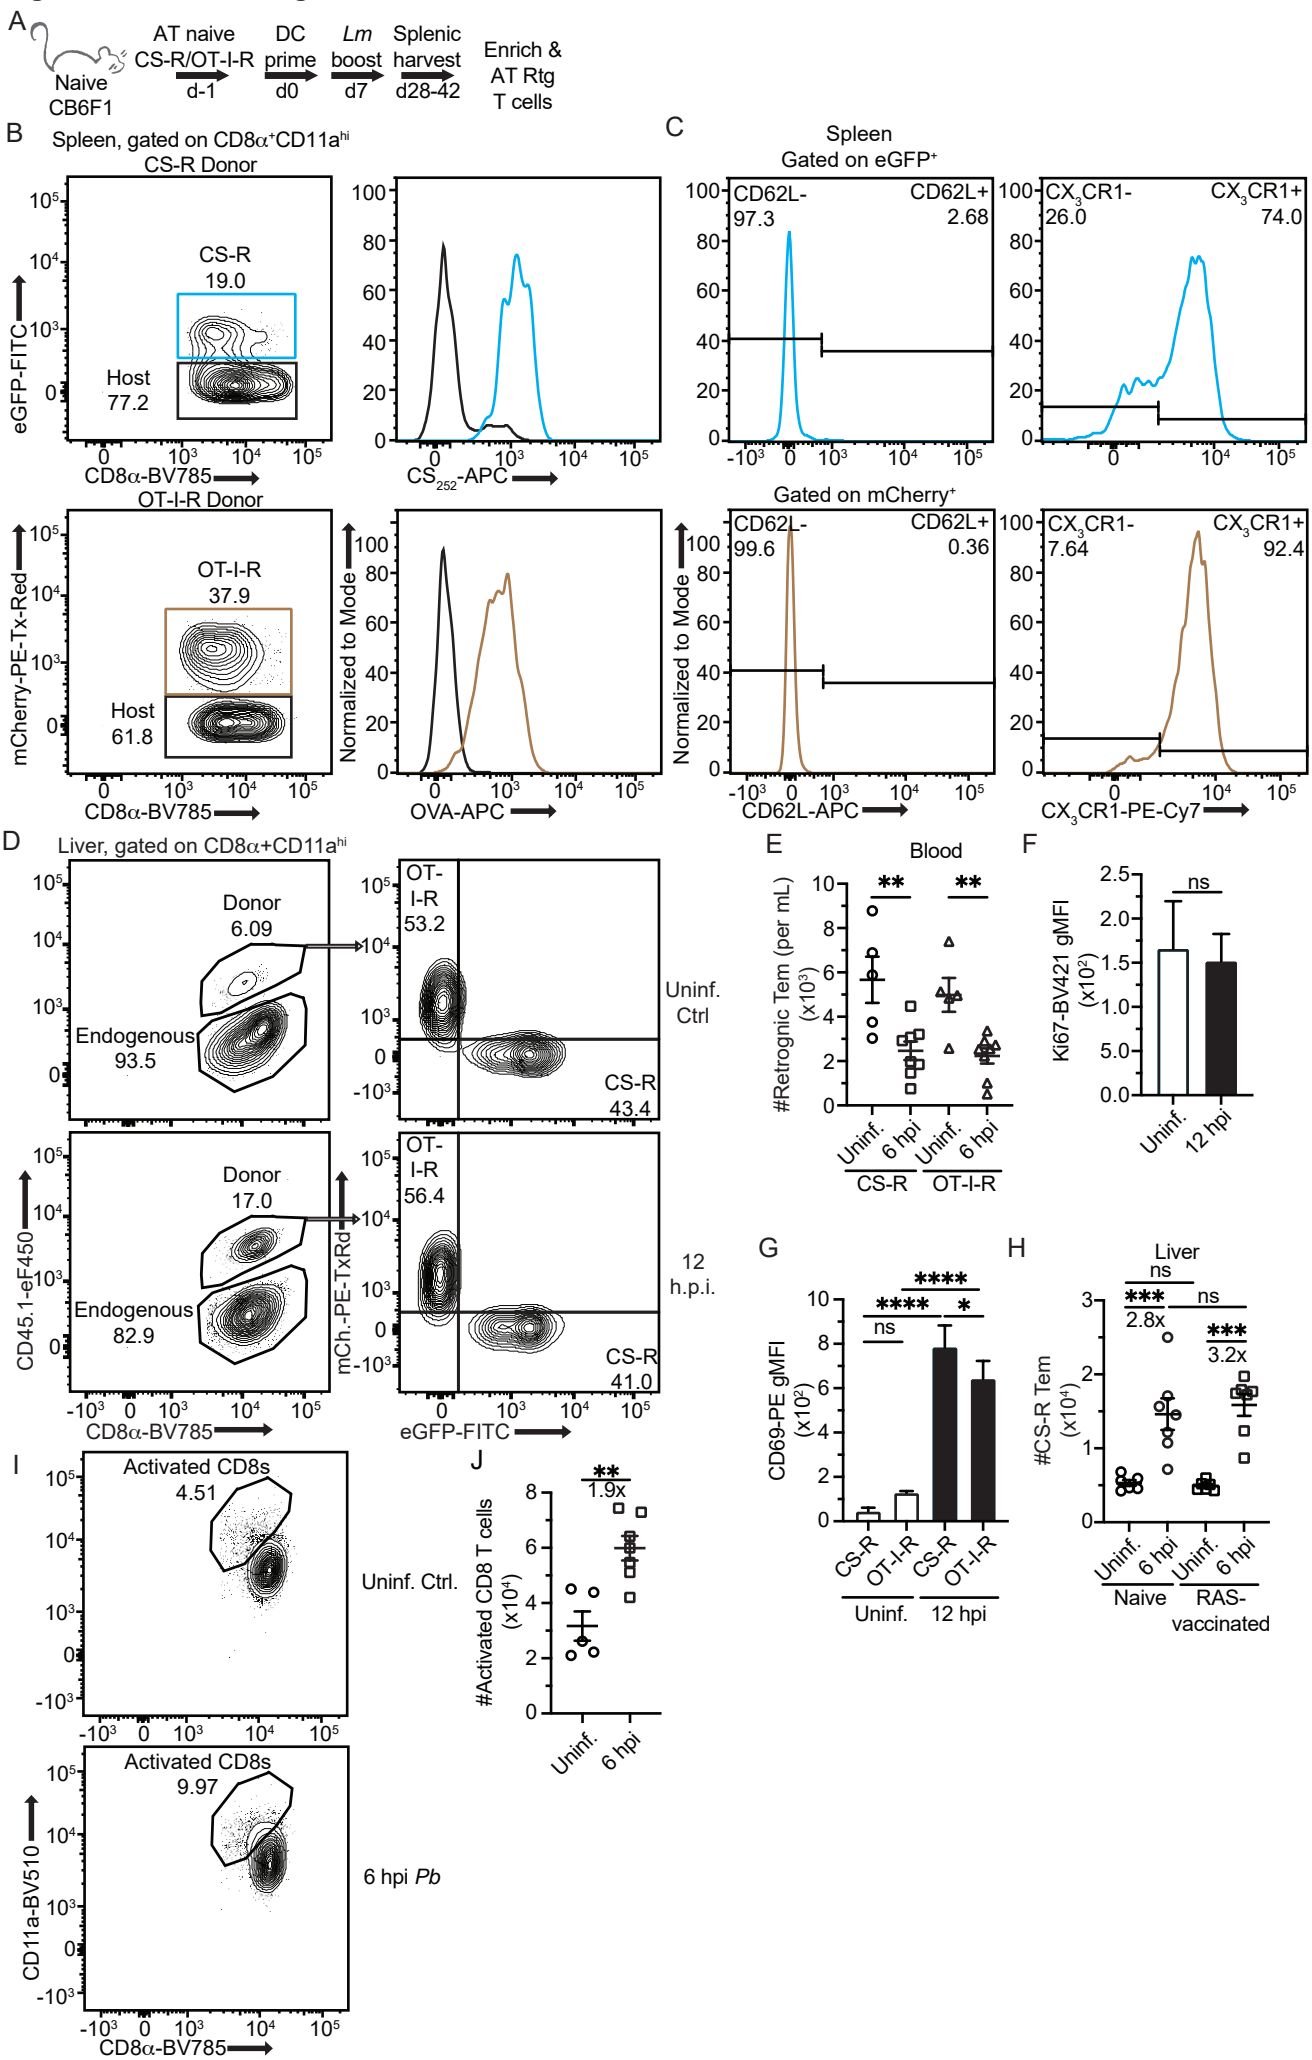

**SUP FIG 2 Circulating retrogenic memory CD8 T cells can be tracked during liver infection (Related to Fig 2).**

A) Experimental schematic of CD45.1/2 Rtg memory CD8 T cell generation in CD45.2/2 CB6F1 mice. Naïve Rtg T cells were transferred to recipient mice followed by immunization with peptide pulsed dendritic cells (DCs) and attenuated recombinant *Lm* expressing secreted CS<sub>252</sub> or OVA peptide. Donor splenocytes from immunized mice were enriched for CD8 $\alpha$ <sup>+</sup> T cells prior to adoptive transfer (AT) and analyses in the liver.

B) Representative flow cytometry demonstrating fluorescence of splenic Rtg T cells and their ability to bind to respective tetramers 28 days post-*Lm*-CS<sub>252</sub>/*Lm*-OVA vaccination.

C) Representative flow cytometry demonstrating patterns of CD62L and CX<sub>3</sub>CR1 expression by splenic CS-R cells 28 days post-*Lm*-CS<sub>252</sub> vaccination.

D) Representative flow cytometry showing gating strategy to identify Rtg donor cells in recipient mice. Rtg cells were co-AT in equal amounts as shown in Figure 3A. Events were derived from live CD8 $\alpha$ <sup>+</sup> singlets.

E) Quantification of Rtg Tem cells recovered from the blood of mice 6 hpi with *Pb* sporozoites. Numbers are presented as per mL of blood volume.

F) Quantification of Ki67 expression by liver-localized CS-R Tem cells 12 hp. with *Pb* sporozoites. One representative result is shown from two experiments; 4 mice per group.

G) Quantification of CD69 expression by liver localized Rtg T cells in uninfected mice or mice 12 hpi with *Pb* sporozoites. One representative result is shown from two experiments; 3-4 mice per group.

H) Quantification of liver-localized CS-R Tem cells recovered from previously naïve or RAS-vaccinated mice 6 hpi with *Pb* sporozoites.

I) Representative flow cytometry demonstrating endogenous liver-localized activated CD8 T cells in previously naïve mice that subsequently received adoptive transfer of CS-R Tem cells. The parent population is live singlet CD8 $\alpha$ <sup>+</sup>CD45.1<sup>-</sup> events.

J) Quantification of liver-localized endogenous activated CD8 T cells recovered from mice 6 hpi with *Pb* sporozoites.

All data except F) and G) are combined from two independent experiments, each with 2-5 mice per group. Each dot represents an individual mouse and mean  $\pm$  SEM are depicted. F) and G) display a representative experiment selected from two independent experiments and mean  $\pm$ SD are depicted. G), H) One way ANOVA (Turkey's post-hoc) comparing the mean of each column to the mean of every other column was performed. E), F), J) Unpaired two-tailed t-tests assuming similar SD were performed. \* $p \leq 0.05$ , \*\* $p \leq 0.01$ , \*\*\* $p \leq 0.001$ , \*\*\*\* $p \leq 0.0001$ , n.s.  $p > 0.05$ .

Figure S3. Related to Figure 4.

A

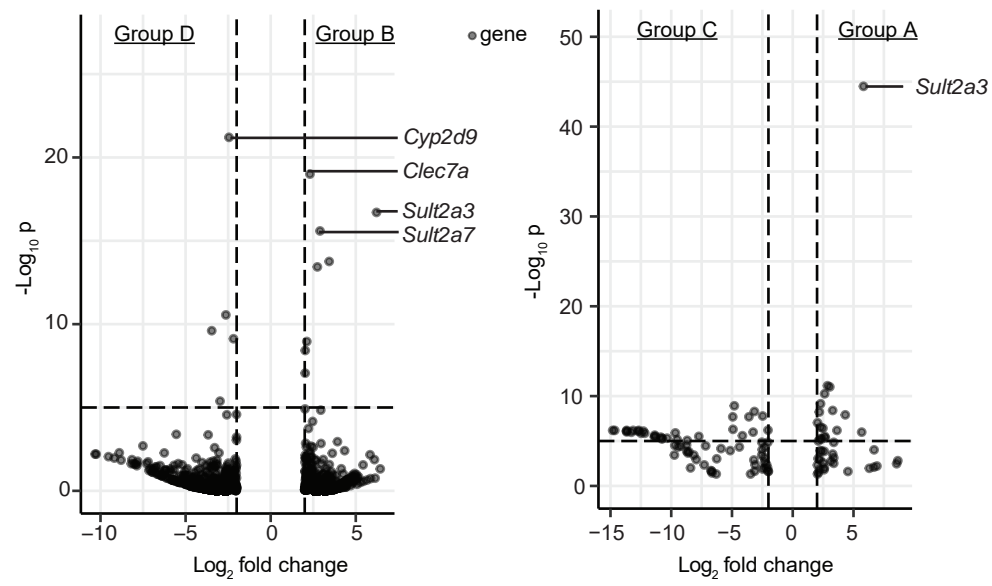

**SUP FIG 3. RAS vaccination status has minimal impact on the liver transcriptional profile (Related to FIG 4).**

A) Volcano plots comparing individual gene expression differences between various groups. Genes with a log<sub>2</sub> fold change between -2 and 2 are excluded. Genes of particular interest are labeled. Dashed lines indicate thresholds of significance for log<sub>2</sub> fold change (x axis,  $\pm 2$ ) and adjusted p value (y axis,  $<0.05$ ).

**Sup Fig 4. Related to Figure 5.**

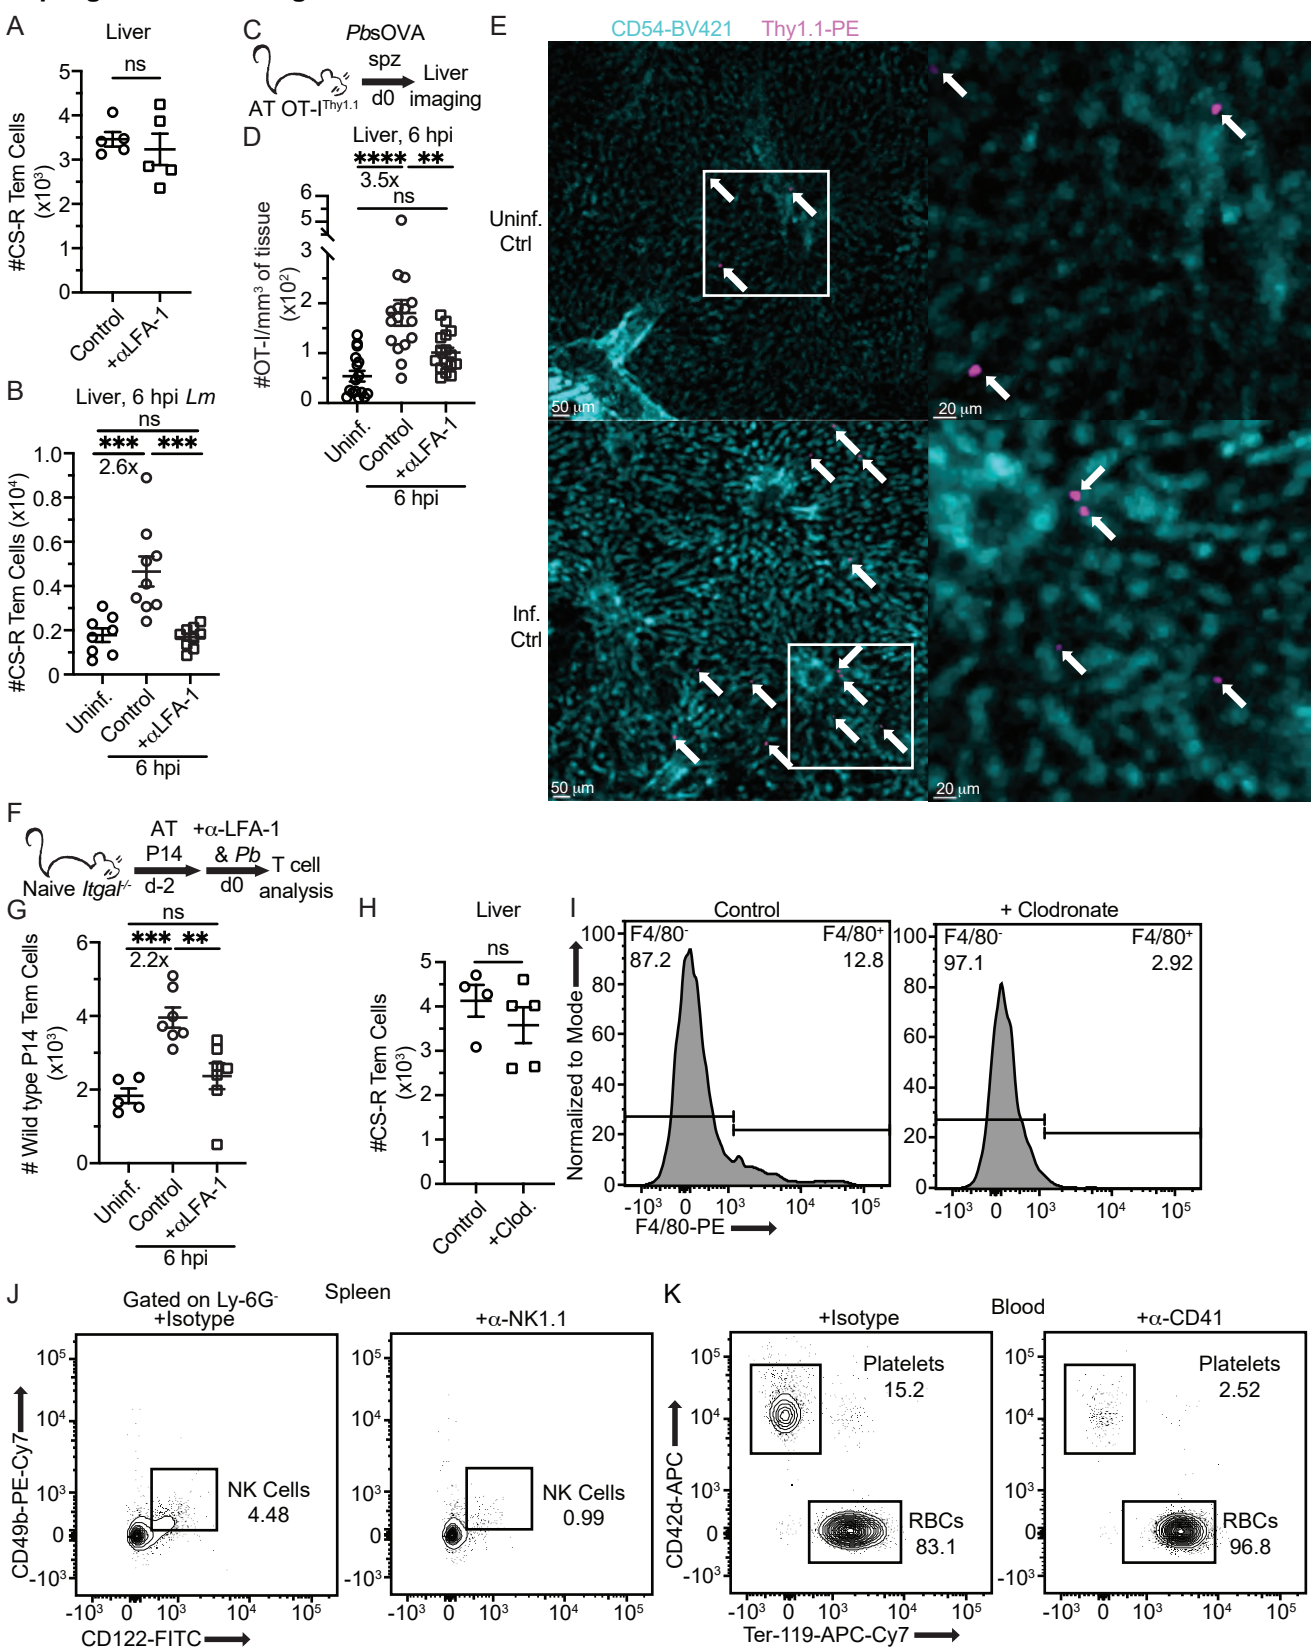



#### **SUP FIG 4. CD8 T cell-intrinsic LFA-1 mediates rapid Tem recruitment (Related to FIG 5).**

- A) Mice received adoptive transfer of  $5 \times 10^5$  CS-R Tem cells, and were treated with isotype control or blocking  $\alpha$ -LFA-1 antibody 2 days later. CS-R Tem cells were enumerated from the livers 3 hours after treatment.
- B) Mice generated as in 4A received challenge with  $10^6$  cfu of virulent *Lm*-OVA with or without LFA-1 blockade. Quantification of liver-localized CS-R Tem cells 6hpi is shown.
- C) Experimental schematic for microscopy experiments.  $10^5$  Thy1.1<sup>+</sup> OT-I cells harvested from the spleens of DC-*Lm*-OVA-vaccinated donor mice were adoptively transferred into naïve Thy1.2<sup>+</sup> C57Bl/6 mice before challenge with  $3 \times 10^4$  transgenic *Pbs*OVA sporozoites, which express secreted OVA during liver-stage infection that can be presented by hepatocyte MHC-I.
- D) Quantification of Thy1.1 OT-I cells in the liver slices of different groups of mice. Each dot represents a number from a single image, with two images captured per slice and two slices imaged per mouse (a total of 4 mice in each group).
- E) Representative 1mm<sup>2</sup> images captured from uninfected and infected control mouse liver slices. Scale bar is 50 $\mu$ m. Blue labels CD54 (expressed constitutively by liver sinusoidal endothelium) and pink labels Thy1.1<sup>+</sup> OT-I memory CD8 T cells (indicated by white arrows). Selected zoomed in images captured from the areas highlighted by white boxes are displayed to the right.
- F), G) Quantification of liver-localized WT P14 Tem cells recovered from LFA-1 KO host mice 6 hpi with  $3 \times 10^4$  *Pb* sporozoites with or without LFA-1 blockade. P14 cells were harvested from the spleens of mice that previously received P14 AT and subsequent DC-*Lm*-gp33-vaccination.
- H) Mice received adoptive transfer of  $5 \times 10^5$  CS-R Tem cells and some were treated with clodronate liposomes 2 days later. CS-R Tem cells were enumerated from the livers 1 day after treatment.
- I) Representative flow cytometry from the livers of control or clodronate liposome-treated mice 1 day post treatment. F4/80<sup>+</sup> events on CD3<sup>+</sup>B220<sup>-</sup>Ly-6C<sup>+</sup>Ly-6G<sup>-</sup> gated cells are displayed.
- J) Representative flow cytometry from the spleens of isotype control or  $\alpha$ -NK1.1-treated mice 1 day post-depletion. CD122 and CD49b expression on Ly-6G<sup>-</sup> spleen cells are displayed.
- K) Representative flow cytometry from the blood of isotype control or  $\alpha$ -CD41-treated 2 hours post-depletion. Platelets are Ter-119<sup>+</sup>CD42d<sup>+</sup>.

All data depict two independent experiments collated, with 2-5 mice per group and are presented as mean  $\pm$  SEM. K), L), and M) show representative findings from their respective experiments. B), D), G) One way ANOVA (Turkey's post-hoc) comparing the mean of each column to the mean of every other column was performed. A), I), J), Unpaired two-tailed t-tests assuming similar SD were performed. \* $p \leq 0.05$ , \*\* $p \leq 0.01$ , \*\*\* $p \leq 0.001$ , \*\*\*\* $p \leq 0.0001$ , ns  $p > 0.05$ .

**Figure S5. Related to Figure 5.**

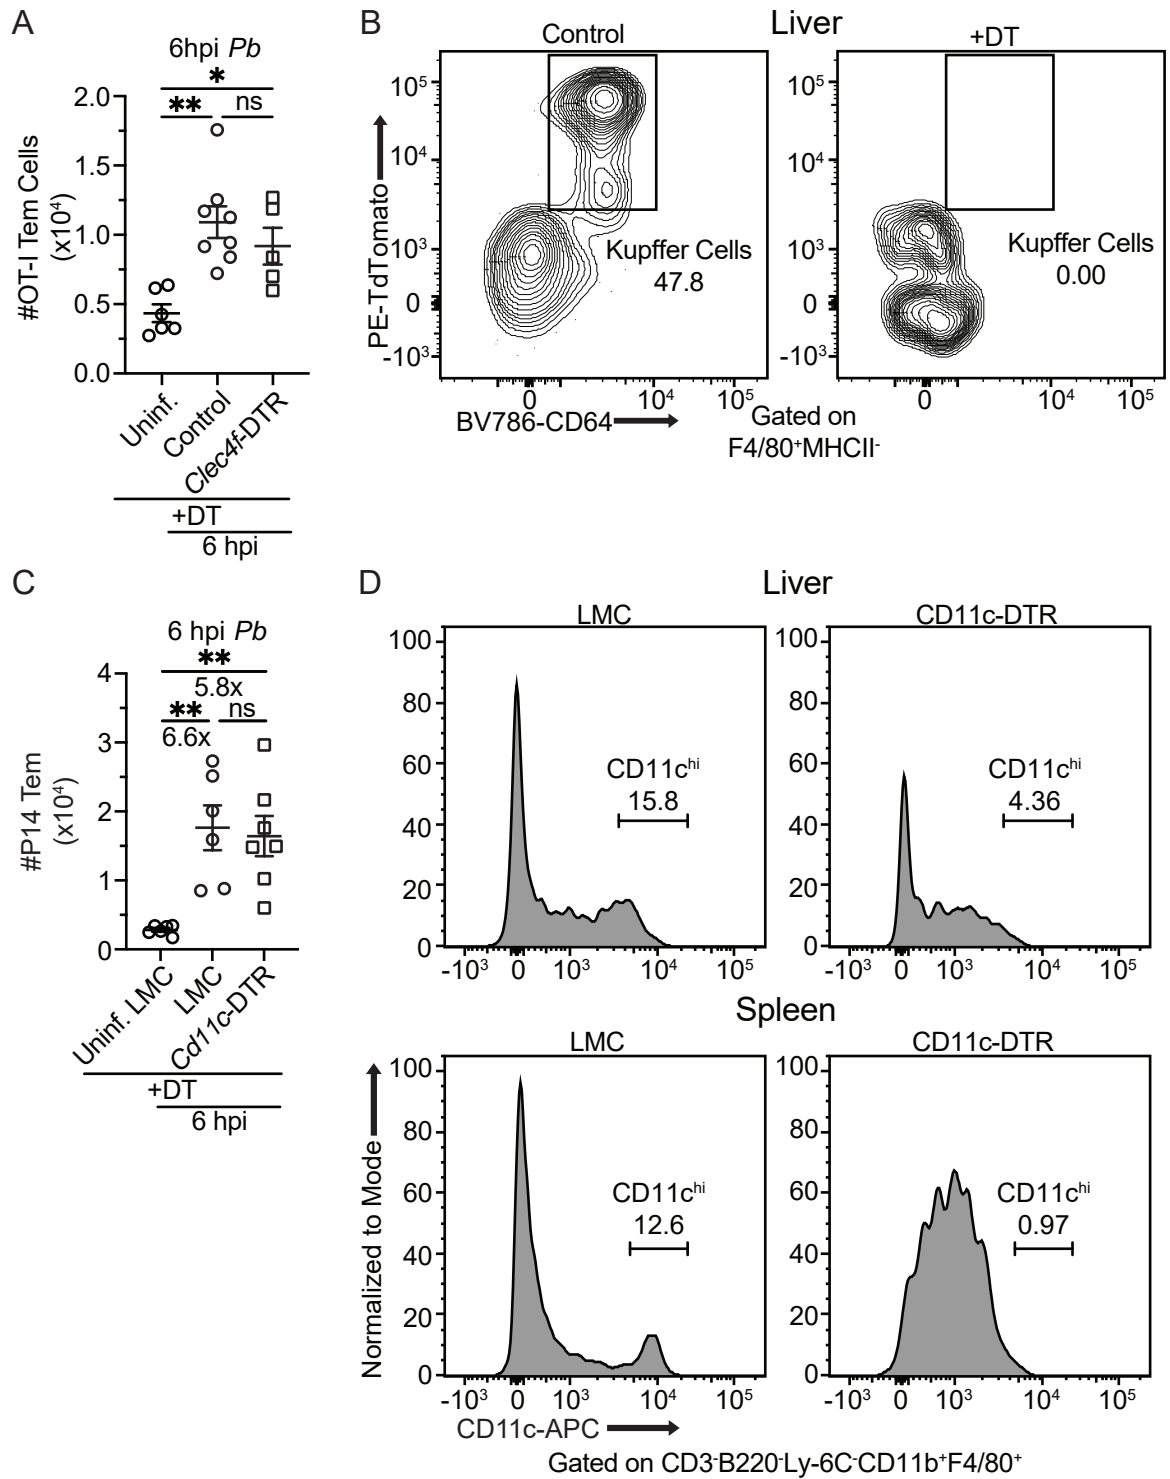

**SUP FIG 5. Kupffer cells and CD11c<sup>hi</sup> cells do not impact Tem recruitment during liver-stage malaria (Related to FIG 5).**

(A) eGFP OT-I cells were enriched from the spleens of DC-*Lm*-OVA-vaccinated wild type C57Bl/6 mice and adoptively transferred into wild type or *Clec4f*-DTR recipients. Mice were treated with 200 ng of diphtheria toxin (DT) 1 day post-transfer. Some were challenged with  $3 \times 10^4$  *Pb* sporozoites 1 day post DT treatment. eGFP OT-I cells were enumerated from livers 6 hpi via flow cytometry.

(B) Representative flow cytometry from the livers of control or DT-treated *Clec4f*-DTR mice 1 day post-depletion. Kupffer cells are F4/80<sup>+</sup>MHC-II<sup>+</sup>CD64<sup>+</sup>, and express TdTomato<sup>+</sup> in *Clec4f*-DTR mice.

(C) Quantification of liver-localized wild type P14 Tem cells recovered from littermate control (LMC) and CD11c-DTR mice 6 hpi with  $3 \times 10^4$  *Pb* sporozoites. Mice were treated with 200ng DT 1 day prior to infection. P14 CD8 T cells were generated as in (S4C).

(D) Representative flow cytometry from the livers (top) and spleens (bottom) of LMC or CD11c-DTR mice 1 day post-DT treatment.

All data depict two independent experiments collated, with 2-4 mice per group and are presented as mean  $\pm$  SEM. (A), (C) One way ANOVA (Turkey's post hoc) comparing the mean of each column to the mean of every other column was performed. \* $p \leq 0.05$ , \*\* $p \leq 0.01$ , \*\*\* $p \leq 0.001$ , \*\*\*\* $p \leq 0.0001$ , ns  $p > 0.05$ .
